# Supplementary material for: Fabrication of mechanically robust films with high transmittance and durable superhydrophilicity by precursor-derived one-step growth and post-treatment
Source: Royal Society of Chemistry journal article supplement (doi:10.1039/c3ta13809g), 2013-10-18
Supplement: c3ta13809g.pdf [file c3ta13809g.pdf]

## Supporting Information

### Fabrication of Mechanically Robust Films with High Transmittance and Durable Superhydrophilicity by Precursor-derived One-step Growth and Post- treatments

**Ligang Xu,<sup>a,b</sup> Junhui He<sup>a,\*</sup> and Lin Yao<sup>a,b</sup>**

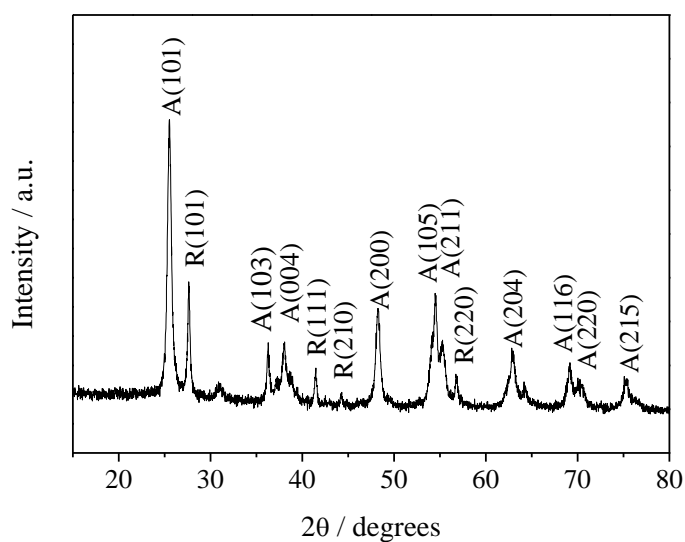

Figure S1. Powder XRD patterns of TiO<sub>2</sub> nanoparticles, crystal planes of anatase (A) and rutile (R) phases are labelled.

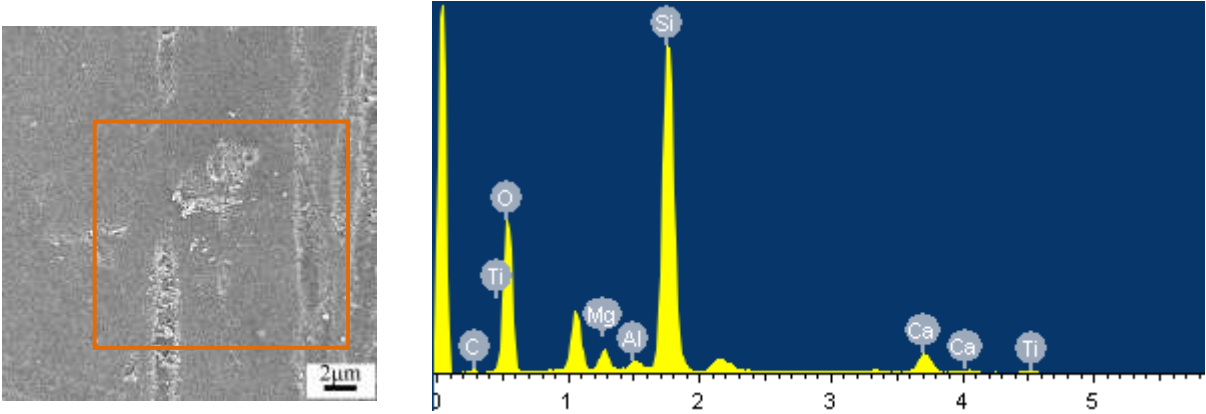

Figure S2 EDS analysis of the AR3 thin film after a Taber abrasion test.

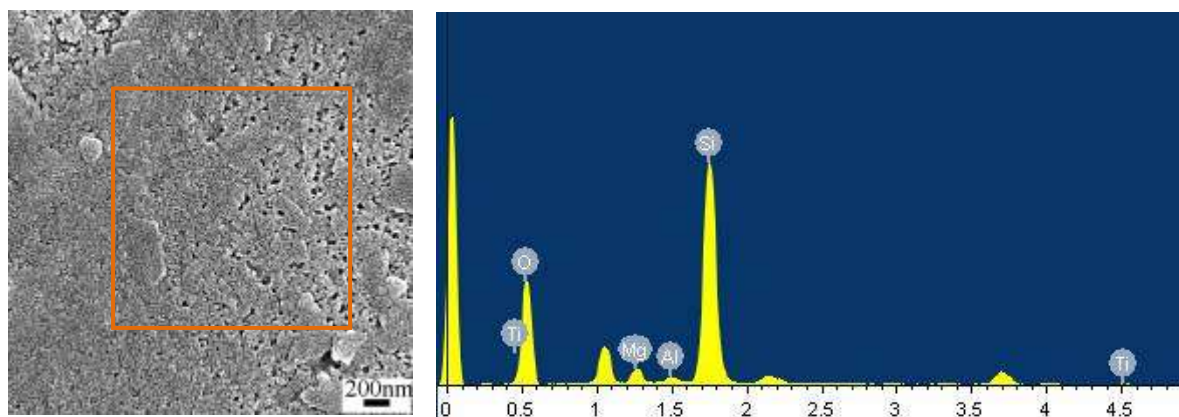

Figure S3 EDS analysis of the AR3 thin film after scratching with a 3H pencil.
